# Supplementary material
Source: publisher figshare collection journal article supplement (https://geolsoc.figshare.com/ndownloader/files/14811986)
Supplement: Supplementary file 1 [file 14811986]

Table 4 Whole-rock Rb-Sr and Sm-Nd isotopic compositions of Gongpoquan volcanic rocks in the Xiaohuangshan area.

| Sample | Rb (ppm) | Sr (ppm) | 87Rb/  86Sr | 87Sr/  86Sr | Error (2σ) | (87Sr/  86Sr)i | Sm (ppm) | Nd (ppm) | 147Sm/  144Nd | 143Nd/  144Nd | Error (2σ) | (143Nd/  144Nd)i | εNd(t) | fSm/Nd | TDM  (Ma) |
| --- | --- | --- | --- | --- | --- | --- | --- | --- | --- | --- | --- | --- | --- | --- | --- |
| BS17-1 | 0.79 | 564 | 0.0042 | 0.705040 | 0.000006 | 0.705015 | 1.65 | 6.32 | 0.1578 | 0.512825 | 0.000005 | 0.512400 | 5.69 | -0.20 | 888 |
| BS17-2 | 15.6 | 409 | 0.1137 | 0.705545 | 0.000007 | 0.704879 | 1.42 | 5.07 | 0.1693 | 0.512795 | 0.000006 | 0.512339 | 4.51 | -0.14 | 1218 |
| BS17-3 | 8.08 | 506 | 0.0476 | 0.705367 | 0.000007 | 0.705088 | 2.06 | 9.39 | 0.1326 | 0.512768 | 0.000005 | 0.512411 | 5.90 | -0.33 | 719 |
| BS19-1 | 18.1 | 471 | 0.1146 | 0.705797 | 0.000006 | 0.705098 | 4.07 | 19.1 | 0.1288 | 0.512704 | 0.000007 | 0.512343 | 5.01 | -0.35 | 801 |
| BS19-2 | 25 | 452 | 0.1649 | 0.705875 | 0.000008 | 0.704870 | 4.02 | 18.6 | 0.1307 | 0.512712 | 0.000006 | 0.512345 | 5.05 | -0.34 | 805 |
| BA11-57 | 23.43 | 442.8 | 0.1531 | 0.705487 | 0.000012 | 0.704582 | 4.745 | 21.05 | 0.1365 | 0.512758 | 0.000010 | 0.512387 | 5.53 | -0.31 | 775 |
| BA11-61 | 12.35 | 508.5 | 0.0703 | 0.705611 | 0.000013 | 0.705196 | 4.338 | 19.12 | 0.1373 | 0.512725 | 0.000011 | 0.512351 | 4.84 | -0.30 | 850 |
| BA11-62 | 20.59 | 458.5 | 0.1339 | 0.705118 | 0.000011 | 0.704327 | 4.347 | 19.23 | 0.1368 | 0.512735 | 0.000010 | 0.512364 | 5.08 | -0.30 | 823 |
| BA11-60 | 23.23 | 420.84 | 0.1646 | 0.706832 | 0.000007 | 0.705845 | 4.29 | 20.49 | 0.1265 | 0.512721 | 0.000010 | 0.512372 | 5.39 | -0.36 | 751 |
| BS44-1 | 37.70 | 632.00 | 0.1778 | 0.705309 | 0.000007 | 0.704217 | 5.76 | 26.40 | 0.1319 | 0.512711 | 0.000010 | 0.512338 | 4.99 | -0.33 | 819 |
| BS20-1 | 37.7 | 632 | 0.1778 | 0.712390 | 0.000008 | 0.711291 | 5.76 | 26.4 | 0.1319 | 0.512223 | 0.000006 | 0.511848 | -4.50 | -0.33 | 1722 |
| BS20-3 | 46 | 588 | 0.2332 | 0.712676 | 0.000007 | 0.711235 | 6.38 | 30.5 | 0.1264 | 0.512177 | 0.000007 | 0.511818 | -5.09 | -0.36 | 1695 |
| BS20-4 | 33.8 | 619 | 0.1628 | 0.712316 | 0.000008 | 0.711309 | 6.24 | 28.5 | 0.1324 | 0.512161 | 0.000009 | 0.511784 | -5.75 | -0.33 | 1849 |
